# Supplementary material for: MXene-driven augmentation of hole-selective self-assembled monolayer interfaces for efficient and stable p-i-n perovskite solar cells
Source: Royal Society of Chemistry journal article supplement (doi:10.1039/d4ta07117d), 2024-11-28
Supplement: d4ta07117d1.pdf [file d4ta07117d1.pdf]

*Supporting Information*

*MXene-Driven Augmentation of Hole-Selective Self-Assembled  
Monolayer Interfaces for Efficient and Stable p-i-n Perovskite  
Solar Cells*

*Kyeong Su Kim<sup>§, §§</sup>, Jung Jae Do<sup>§, §§</sup>, and Jae Woong Jung<sup>§, §§\*</sup>*

<sup>§</sup>Integrated Education Institute for Frontier Materials (BK21 Four), Kyung Hee University,  
1732 Deogyong-daero, Giheung-gu, Yongin-si, Gyeonggi-do 446-701, Republic of Korea

<sup>§§</sup>Department of Advanced Materials Engineering for Information & Electronics, Kyung Hee  
University, 1732 Deogyong-daero, Giheung-gu, Yongin-si, Gyeonggi-do 446-701, Republic  
of Korea

\* Corresponding author: [wodndwjd@khu.ac.kr](mailto:wodndwjd@khu.ac.kr) (Prof. J. W. Jung)

**Table S1.** TRPL fitting results of CsFAPbI<sub>3</sub> films with varied hole-selective interlayers.

| Hole-selective interlayer  | $\tau_1$ (ns) | $\tau_2$ (ns) | $A_1$   | $A_2$   | $\tau_{\text{avg}}^*$ (ns) |
|----------------------------|---------------|---------------|---------|---------|----------------------------|
| no interlayer              | 2.22          | 97.91         | 5137.78 | 5497.06 | 95.92                      |
| MeO-2PACz                  | 3.97          | 46.06         | 5213.93 | 4024.53 | 41.83                      |
| MeO-2PACz/MXene 0.01 mg/ml | 4.42          | 24.28         | 6373.24 | 3648.16 | 19.49                      |
| MeO-2PACz/MXene 0.02 mg/ml | 5.49          | 26.28         | 5224.25 | 3748.35 | 21.59                      |
| MeO-2PACz/MXene 0.03 mg/ml | 6.03          | 49.05         | 5307.1  | 3318.05 | 41.99                      |

**Table S2.** Photovoltaic parameters of PSCs with different concentrations of MXene onto MeO-2PACz hole-selective interfaces.

| Con. MXene<br>[mg ml <sup>-1</sup> ] | $V_{\text{OC}}$<br>[V] | $J_{\text{SC}}$<br>[mA cm <sup>-2</sup> ] | Integrated $J_{\text{SC}}$<br>[mA cm <sup>-2</sup> ] | FF<br>[%] | PCE<br>[%] |
|--------------------------------------|------------------------|-------------------------------------------|------------------------------------------------------|-----------|------------|
| -                                    | 1.112                  | 23.66                                     | 23.09                                                | 79.30     | 20.86      |
| 0.005                                | 1.110                  | 23.44                                     | 23.11                                                | 79.37     | 20.65      |
| 0.008                                | 1.111                  | 23.76                                     | 23.06                                                | 79.28     | 20.93      |

**Table S3.** Photovoltaic parameters of PSCs with varied concentration of MXene onto MeO-2PACz hole-selective interfaces at different scan directions.

| Con. MXene<br>[mg ml <sup>-1</sup> ] | Scan<br>direction | $V_{\text{OC}}$<br>[V] | $J_{\text{SC}}$<br>[mA cm <sup>-2</sup> ] | FF<br>[%] | PCE<br>[%] | HI     |
|--------------------------------------|-------------------|------------------------|-------------------------------------------|-----------|------------|--------|
| 0.00                                 | FS                | 1.09                   | 24.09                                     | 0.79      | 20.74      | 0.0222 |
|                                      | RS                | 1.08                   | 24.09                                     | 0.78      | 20.29      |        |
| 0.01                                 | FS                | 1.13                   | 24.18                                     | 0.82      | 22.41      | 0.0087 |
|                                      | RS                | 1.14                   | 24.18                                     | 0.82      | 22.60      |        |
| 0.02                                 | FS                | 1.11                   | 24.26                                     | 0.77      | 20.73      | 0.0131 |
|                                      | RS                | 1.11                   | 24.26                                     | 0.76      | 20.46      |        |
| 0.03                                 | FS                | 1.10                   | 23.23                                     | 0.76      | 19.42      | 0.0218 |
|                                      | RS                | 1.11                   | 23.23                                     | 0.77      | 19.86      |        |

**Table S4.** EIS fitting results of PSCs with and without MXene loading in hole-selective interlayers.

| Perovskite      | EIS fitting           |                                  | SCLC (hole-only)        |                                          |
|-----------------|-----------------------|----------------------------------|-------------------------|------------------------------------------|
|                 | $R_s$<br>( $\Omega$ ) | $R_{\text{rec}}$<br>( $\Omega$ ) | $V_{\text{TFL}}$<br>(V) | $N_t^*$<br>( $10^{15} \text{ cm}^{-3}$ ) |
| MeO-2PACz       | 48.1                  | 3827                             | 0.72                    | 3.99                                     |
| MeO-2PACz/MXene | 33.5                  | 5361                             | 0.52                    | 2.22                                     |

**Table S5.** Contact angle result of MeO-2PACz and MXene/MeO-2PACz films on glass substrate.

| Sample                | Contact angle ( $^\circ$ ) |                  |                  | Surface energy<br>(mJ/m <sup>2</sup> ) |
|-----------------------|----------------------------|------------------|------------------|----------------------------------------|
|                       | DI water                   | Diiodomethane    | Formamide        |                                        |
| MeO-2PACz/glass       | 41.1                       | 9.6              | 31.3             | 56.02                                  |
|                       | (39.7 $\pm$ 2.3)           | (9.0 $\pm$ 0.5)  | (31.4 $\pm$ 0.8) |                                        |
| MXene/MeO-2PACz/glass | 52.6                       | 7.8              | 34.7             | 67.88                                  |
|                       | (44.8 $\pm$ 5.1)           | (10.3 $\pm$ 2.3) | (34.9 $\pm$ 0.8) |                                        |

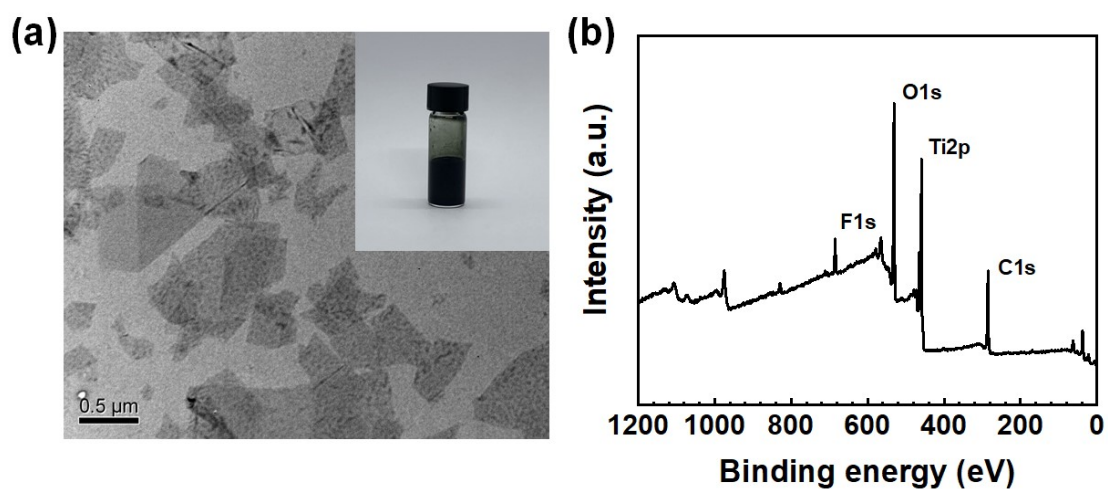

**Figure S1.** (a) TEM image and (b) XPS binding energy spectrum of MXene ( $\text{Ti}_3\text{C}_2\text{T}_x$ ) nanosheets prepared in this work. The photographic image of MXene dispersion in water (1 mg/ml) is displayed in inset of Figure S1a.

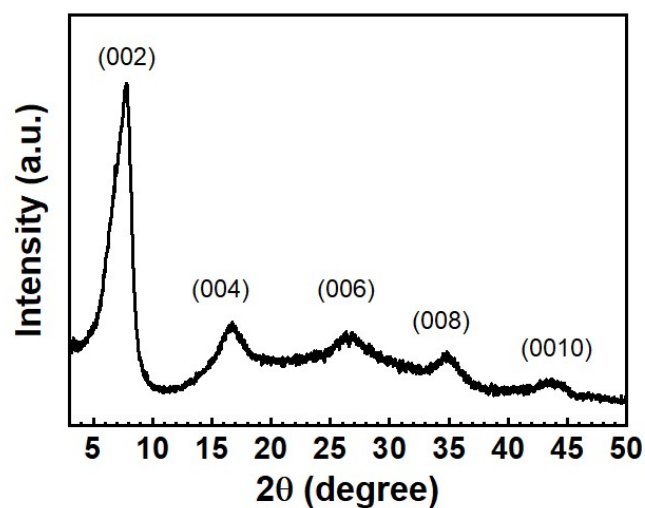

**Figure S2.** XRD diffractogram of MXene ( $\text{Ti}_3\text{C}_2\text{T}_x$ ) film prepared in this work.

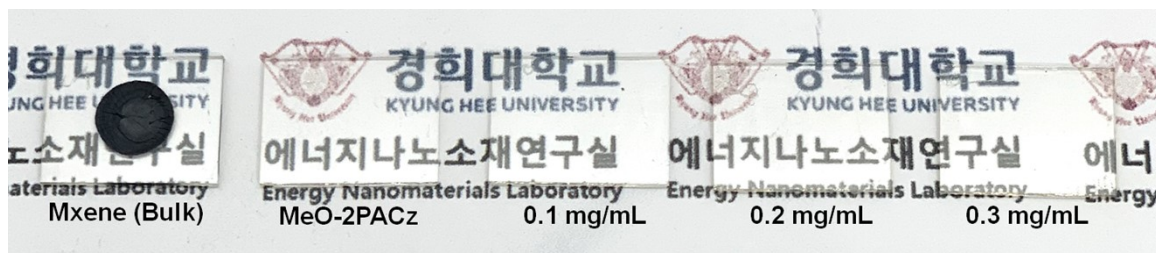

**Figure S3.** Photographic images of MXene (bulk), MeO-2PACz, MeO<sub>2</sub>PACz/MXene films with varied concentration of MXene deposition.

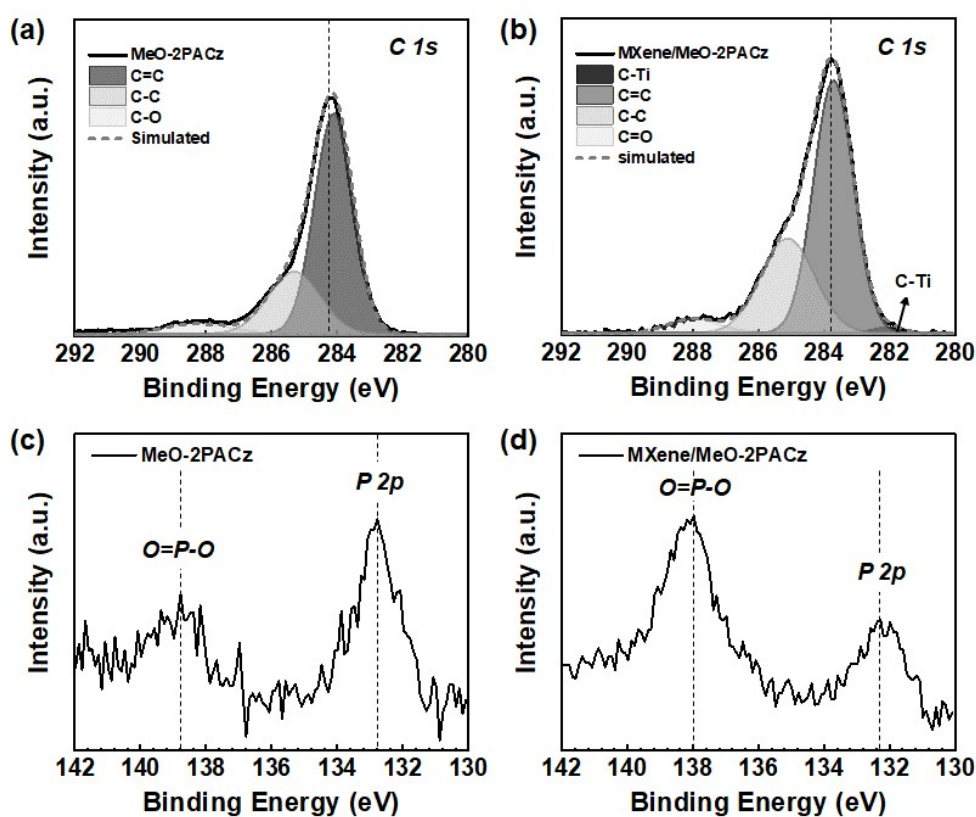

**Figure S4.** High-resolution XPS binding energy spectra of pristine MeO-2PACz film (a and c) and MXene/MeO-2PACz film (b and d) for C 1s (a and b) and P 2p (c and d), respectively.

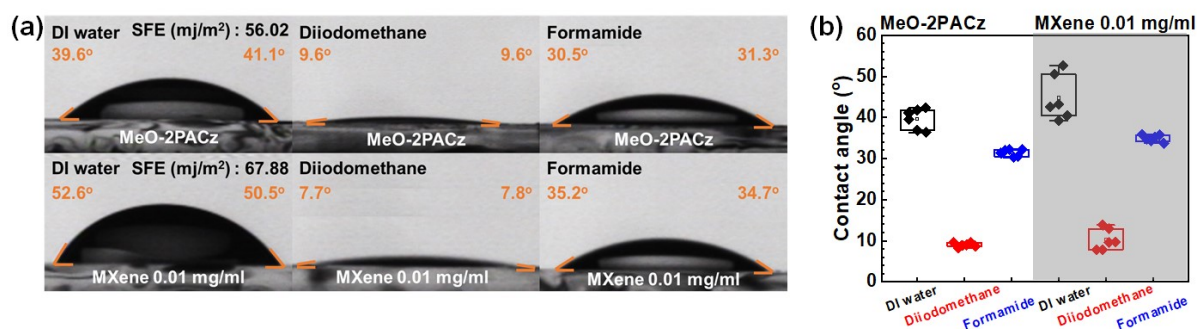

**Figure S5.** (a) Photographic images of contact angle of MeO-2PACz and MeO-2PACz/SAM for DI water, diiodomethane, and formamide, and (b) the summary of contact angles from 8 different samples in each condition.

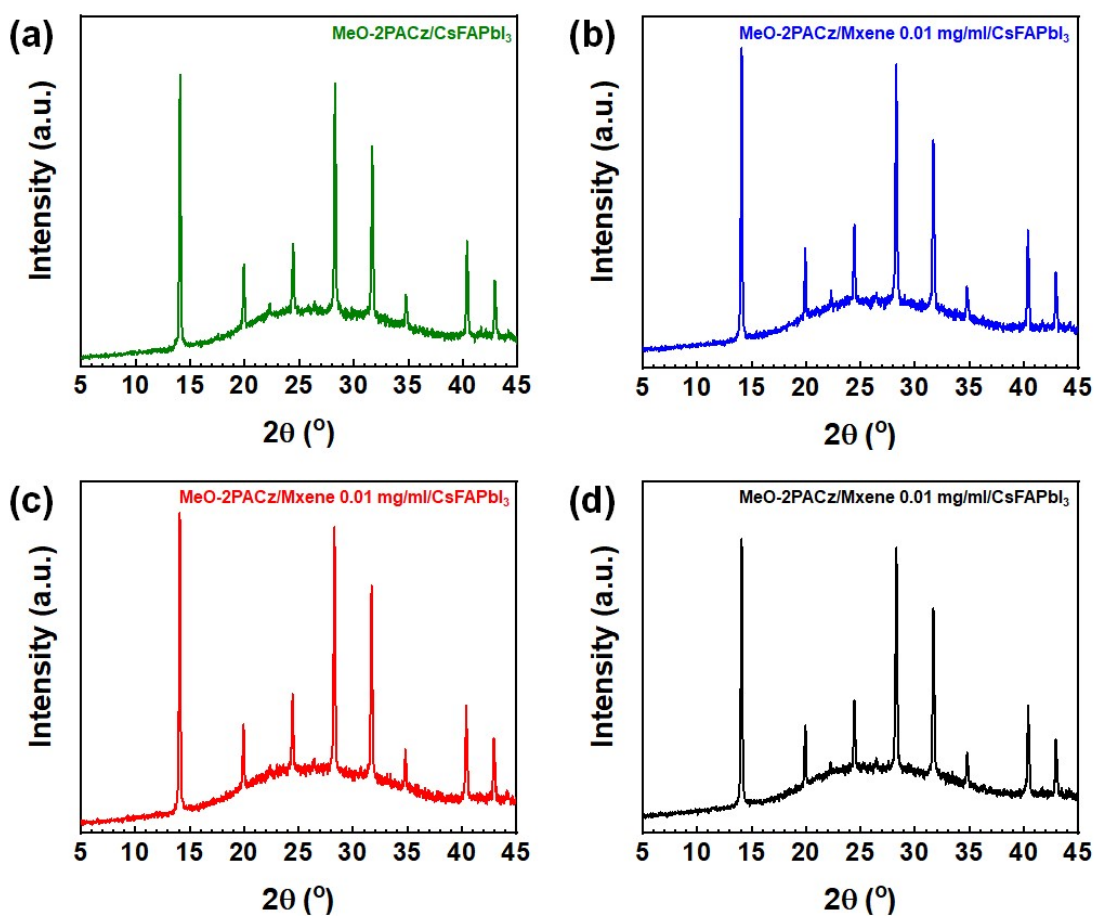

**Figure S6.** XRD patterns of CsFAPbI<sub>3</sub> perovskite films with varied substrate.

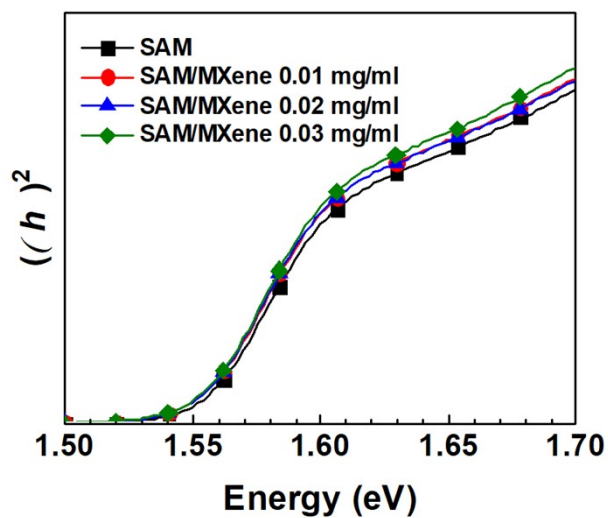

Figure S7. Tau plots of CsFAPbI<sub>3</sub> perovskite films grown on varied substrate.

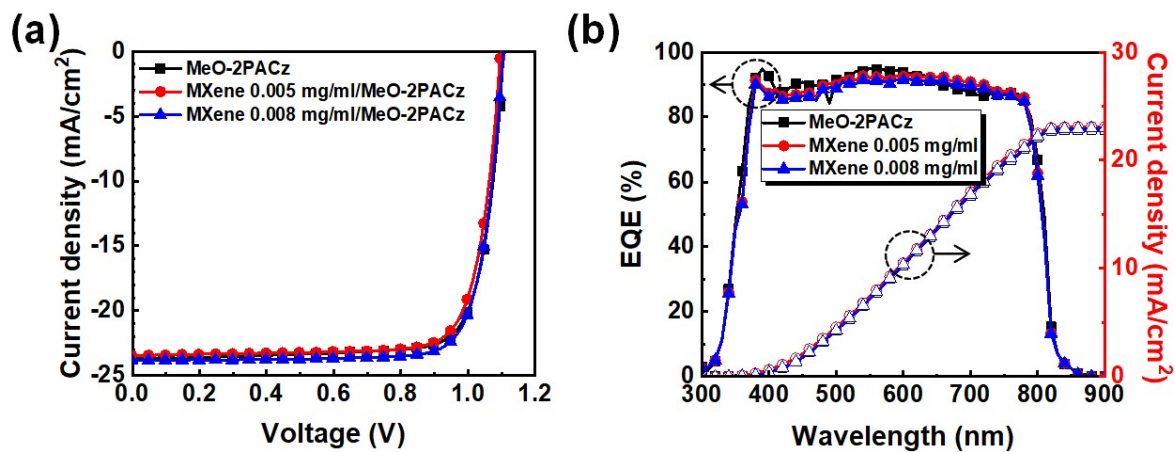

Figure S8.  $J$ - $V$  curves (a) and EQE spectra (b) of the devices of PSCs different concentrations of MXene onto MeO-2PACz hole-selective interfaces.

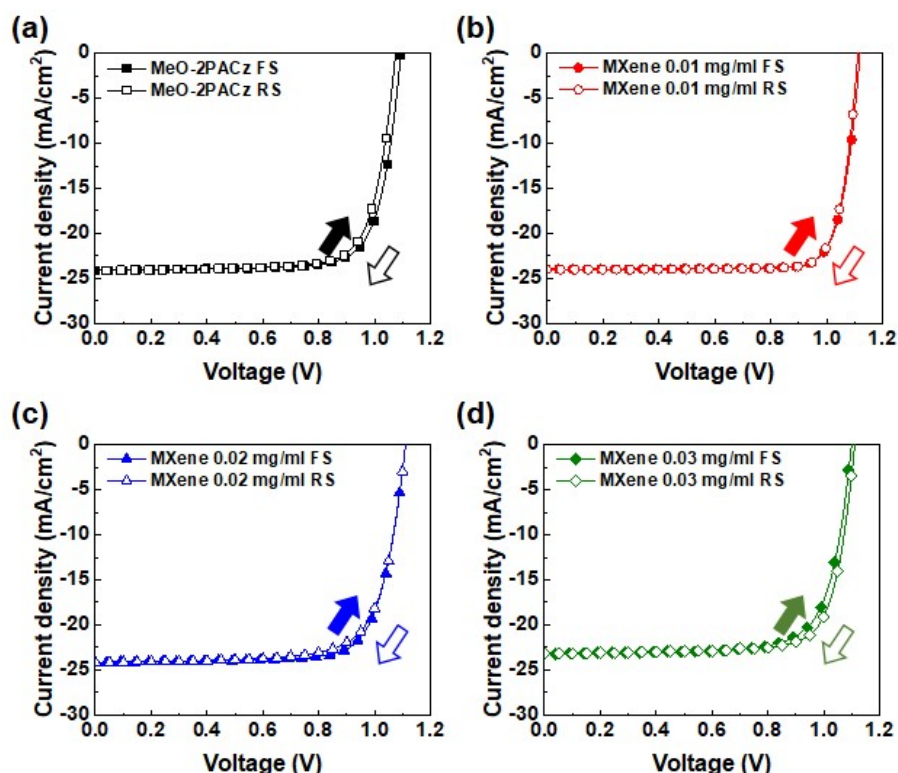

**Figure S9.**  $J$ - $V$  curves of devices made of different hole-injecting interfaces with varied scan directions: (a) MeO-2PACz, (b) MXene 0.01 mg/ml on MeO-2PACz, (c) MXene 0.02 mg/ml on MeO-2PACz, (d) MXene 0.03 mg/ml on MeO-2PACz.

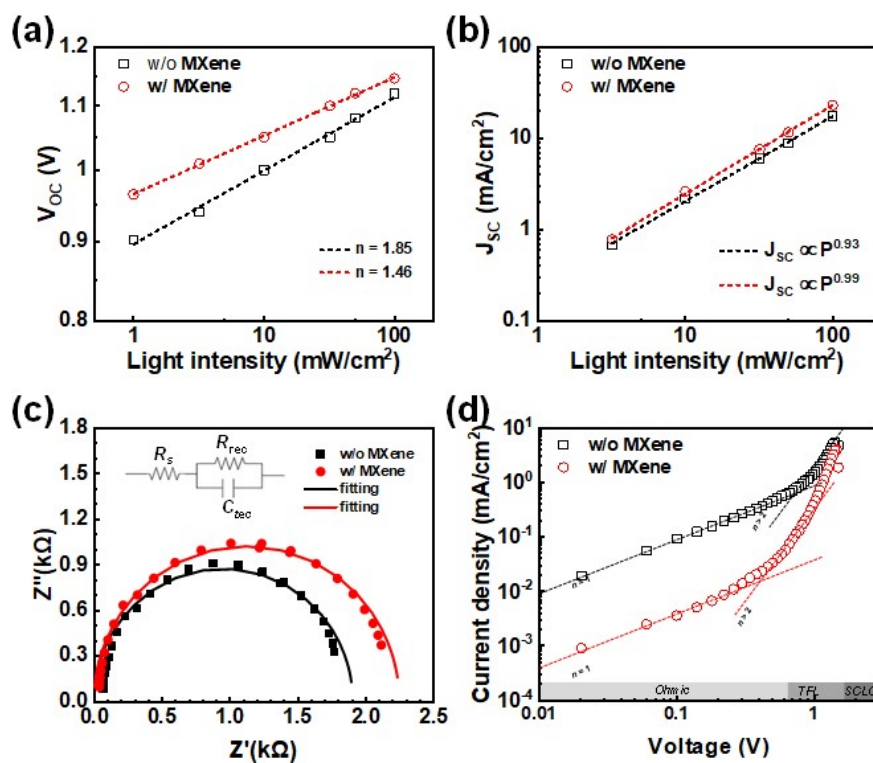

**Figure S10.** (a) Light intensity-dependent  $V_{OC}$  decays, (b)  $J_{SC}$  decays, (c) Nyquist plots, and (d) SCLC measurements of devices with and without MXene.
